# Supplementary figures and images for: Tumor rejection in Cblb −/− mice depends on IL-9 and Th9 cells
Source: HighWire-hosted journal article supplement (doi:10.1136/jitc-2021-002889), 2021-07-01

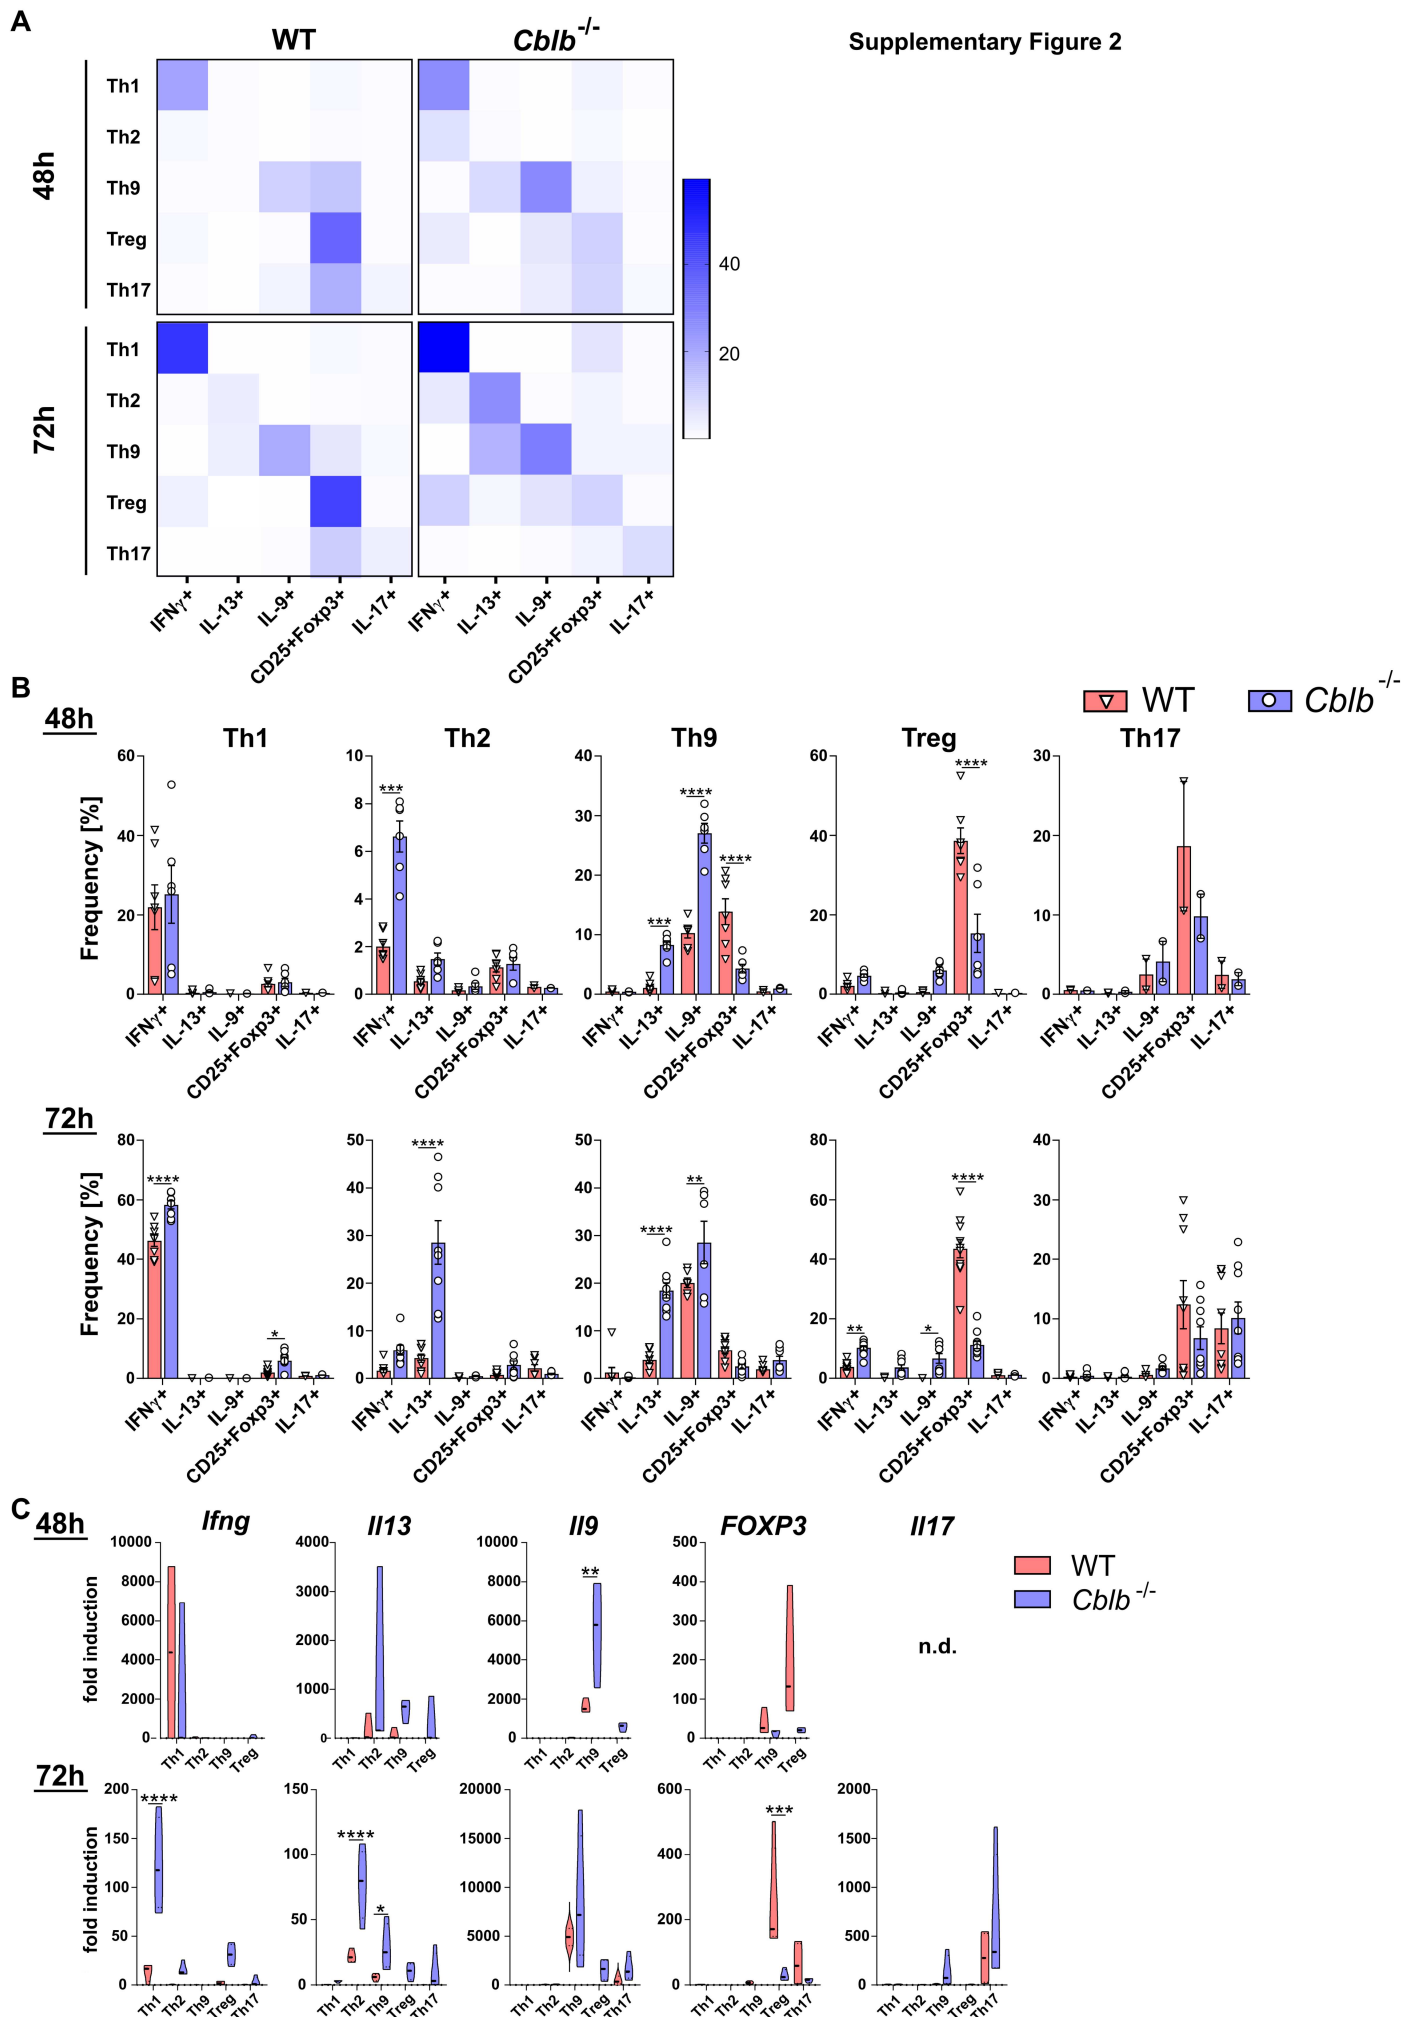

Supplement: jitc-2021-002889supp002_data_supplement.pdf [file jitc-2021-002889supp002_data_supplement.pdf]

**A**

**48h**

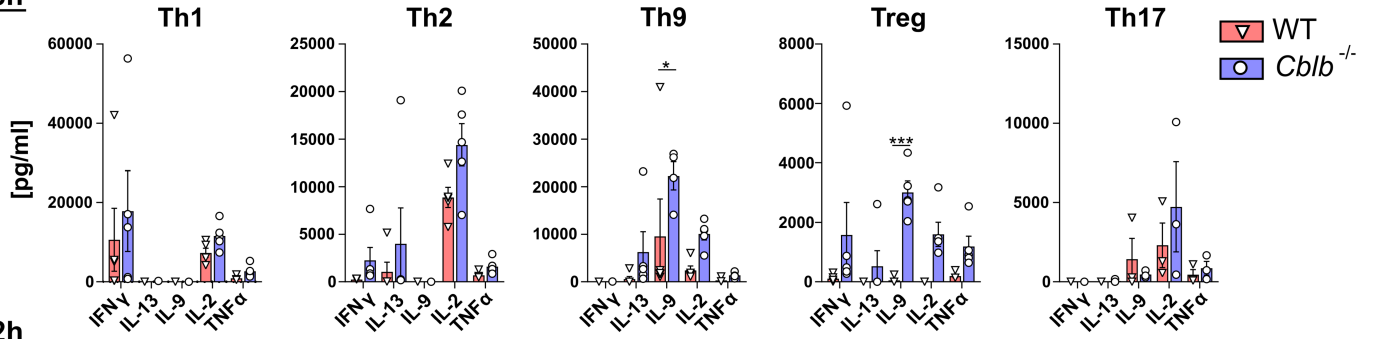

**B**

**72h**

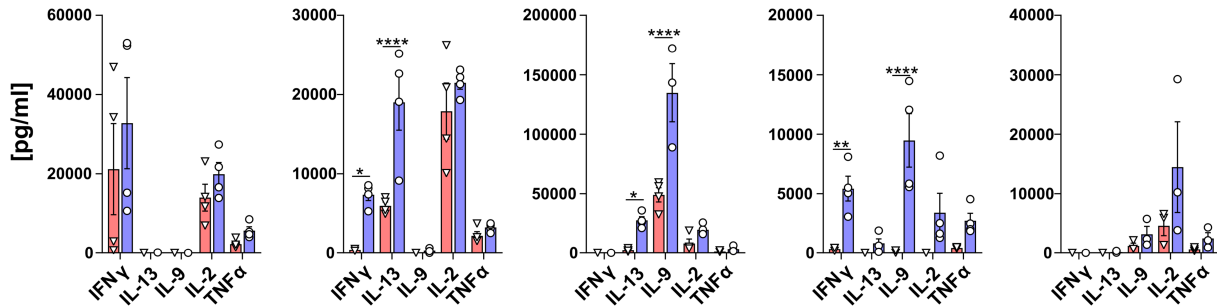

**C**

**TNF $\alpha$**

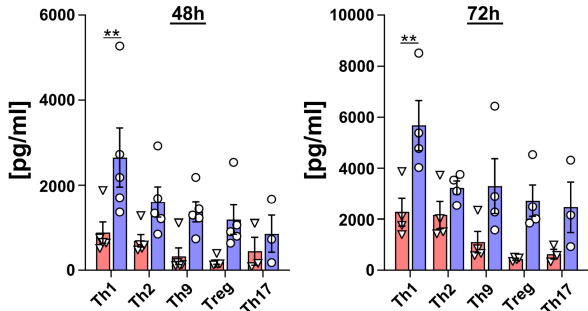

Supplement: jitc-2021-002889supp003_data_supplement.pdf [file jitc-2021-002889supp003_data_supplement.pdf]

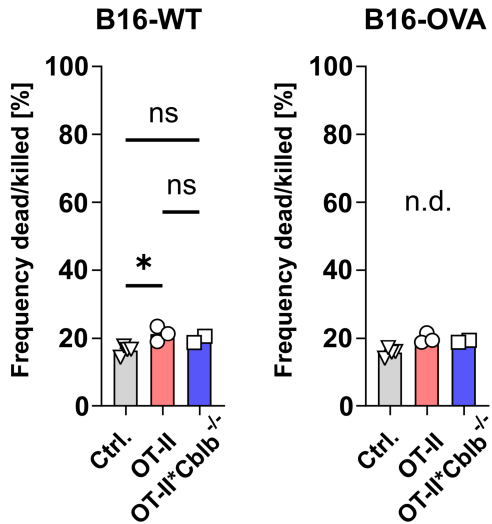

B16-OVA → CFSE low  
 B16-WT → CFSE high

Th9 cells

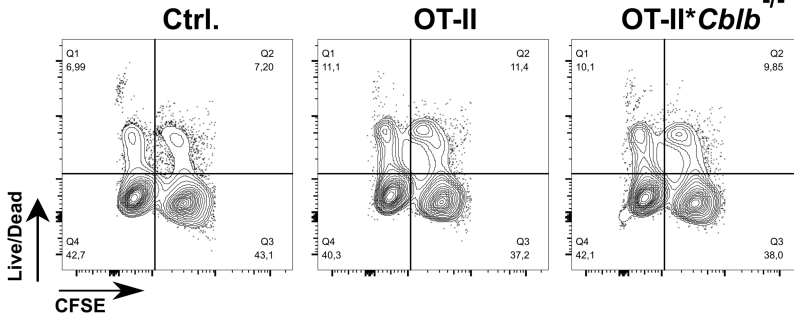

Supplement: jitc-2021-002889supp007_data_supplement.pdf [file jitc-2021-002889supp007_data_supplement.pdf]
